# Supplementary material
Source: PubMed Central journal article supplement (PMC7428041)
Supplement: rspa20200038_review_history.pdf [file rspa20200038_review_history.pdf]

## Globe-hopping

Dmitry Chistikov, Olga Goulko, Adrian Kent and Mike Paterson

### Article citation details

*Proc. R. Soc. A* **476**: 20200038.

<http://dx.doi.org/10.1098/rspa.2020.0038>

### Review timeline

Original submission: 21 January 2020

Revised submission: 12 May 2020

Final acceptance: 15 May 2020

Note: Reports are unedited and appear as submitted by the referee. The review history appears in chronological order.

## Review History

### RSPA-2020-0038.R0 (Original submission)

#### Review form: Referee 1

**Is the manuscript an original and important contribution to its field?**

Excellent

**Is the paper of sufficient general interest?**

Good

**Is the overall quality of the paper suitable?**

Excellent

**Do you have any ethical concerns with this paper?**

No

**Recommendation?**

Accept as is

**Comments to the Author(s)**

This manuscript constitutes an important advancement towards fully utilizing the advantage offered to by the most complete---up to date---generalization of Bell inequalities, i.e. the "grasshopper inequalities". The paper considers two directions.

In one, the practically most relevant grasshopper problem on a sphere is restricted to its grand

circle. The authors' solutions also illustrate how powerless our intuition is this class of problems--a failure similar to the one one experiences when the questions pertaining to the ergodicity and the temporal to ensemble average convergence in the irrational rotation problem. For one, there is a dramatic difference between cases when the first lawn and the second lawn are the same and the case when they are different. Also, the dangerously looking finite precision loophole unexpectedly closes when the circle is extended to the sphere.

In the spherical case, the authors refute two significant conjectures proposed in the foundational paper by Kent and Pitalua-Garcia. Also, for not too large jump angles, the intuition gained and the numerical methods developed by two of the authors in the planar case [Gulko-Kent (2017)] is proven useful and relevant in the spherical one.

The importance of this paper for improving the security of quantum encryption is hard to overestimate, and I suggest publishing as is.

## Review form: Referee 2

**Is the manuscript an original and important contribution to its field?**

Excellent

**Is the paper of sufficient general interest?**

Excellent

**Is the overall quality of the paper suitable?**

Excellent

**Can the paper be shortened without overall detriment to the main message?**

Yes

**Do you think some of the material would be more appropriate as an electronic appendix?**

Yes

**Do you have any ethical concerns with this paper?**

No

**Recommendation?**

Accept with minor revision (please list in comments)

**Comments to the Author(s)**

This is a well-written paper. I have some comments:

1- The computational complexity of Globe-hopping should be discussed. I suggest using the big oh notation.

To have an unbiased view in the paper, there should be some discussions on the limitations the Globe-hopping

## Decision letter (RSPA-2020-0038.R0)

29-Apr-2020

Dear Dr Goulko,

On behalf of the Editor, I am pleased to inform you that your Manuscript RSPA-2020-0038 entitled "Globe-hopping" has been accepted for publication subject to minor revisions in Proceedings A. Please find the referees' comments below.

The reviewer(s) have recommended publication, but also suggest some minor revisions to your manuscript. Therefore, I invite you to respond to the reviewer(s)' comments and revise your manuscript. Please note that we have a strict upper limit of 28 pages for each paper. Please endeavour to incorporate any revisions while keeping the paper within journal limits. Please note that page charges are made on all papers longer than 20 pages. If you cannot pay these charges you must reduce your paper to 20 pages before submitting your revision. Your paper has been ESTIMATED to be 22 pages. We cannot proceed with typesetting your paper without your agreement to meet page charges in full should the paper exceed 20 pages when typeset. If you have any questions, please do get in touch.

It is a condition of publication that you submit the revised version of your manuscript within 7 days. If you do not think you will be able to meet this date please let me know in advance of the due date.

To revise your manuscript, log into <https://mc.manuscriptcentral.com/prsa> and enter your Author Centre, where you will find your manuscript title listed under "Manuscripts with Decisions." Under "Actions," click on "Create a Revision." Your manuscript number has been appended to denote a revision.

You will be unable to make your revisions on the originally submitted version of the manuscript. Instead, revise your manuscript and upload a new version through your Author Centre.

When submitting your revised manuscript, you will be able to respond to the comments made by the referee(s) and upload a file "Response to Referees" in "Section 6 - File Upload". You can use this to document any changes you make to the original manuscript. In order to expedite the processing of the revised manuscript, please be as specific as possible in your response to the referee(s).

**IMPORTANT:** Your original files are available to you when you upload your revised manuscript. Please delete any redundant files before completing the submission process.

In addition to addressing all of the reviewers' and editor's comments, your revised manuscript **MUST** contain the following sections before the reference list (for any heading that does not apply to your work, please include a comment to this effect):

- Acknowledgements
- Funding statement

See <https://royalsociety.org/journals/authors/author-guidelines/> for further details.

When uploading your revised files, please make sure that you include the following as we cannot proceed without these:

- 1) A text file of the manuscript (doc, txt, rtf or tex), including the references, tables (including

captions) and figure captions. Please remove any tracked changes from the text before submission. PDF files are not an accepted format for the "Main Document".

2) A separate electronic file of each figure (tif, eps or print-quality pdf preferred). The format should be produced directly from original creation package, or original software format.

3) Electronic Supplementary Material (ESM): all supplementary materials accompanying an accepted article will be treated as in their final form. Note that the Royal Society will not edit or typeset supplementary material and it will be hosted as provided. Please ensure that the supplementary material includes the paper details where possible (authors, article title, journal name). Supplementary files will be published alongside the paper on the journal website and posted on the online figshare repository (<https://figshare.com>). The heading and legend provided for each supplementary file during the submission process will be used to create the figshare page, so please ensure these are accurate and informative so that your files can be found in searches. Files on figshare will be made available approximately one week before the accompanying article so that the supplementary material can be attributed a unique DOI. Alternatively you may upload a zip folder containing all source files for your manuscript as described above with a PDF as your "Main Document". This should be the full paper as it appears when compiled from the individual files supplied in the zip folder.

#### Article Funder

Please ensure you fill in the Article Funder question on page 2 to ensure the correct data is collected for FundRef (<http://www.crossref.org/fundref/>).

#### Media summary

Please ensure you include a short non-technical summary (up to 100 words) of the key findings/importance of your paper. This will be used for to promote your work and marketing purposes (e.g. press releases). The summary should be prepared using the following guidelines:

\*Write simple English: this is intended for the general public. Please explain any essential technical terms in a short and simple manner.

\*Describe (a) the study (b) its key findings and (c) its implications.

\*State why this work is newsworthy, be concise and do not overstate (true 'breakthroughs' are a rarity).

\*Ensure that you include valid contact details for the lead author (institutional address, email address, telephone number).

#### Cover images

We welcome submissions of images for possible use on the cover of Proceedings A. Images should be square in dimension and please ensure that you obtain all relevant copyright permissions before submitting the image to us. If you would like to submit an image for consideration please send your image to [proceedingsa@royalsociety.org](mailto:proceedingsa@royalsociety.org)

Once again, thank you for submitting your manuscript to Proceedings A and I look forward to receiving your revision. If you have any questions at all, please do not hesitate to get in touch.

Best wishes  
Raminder Shergill  
[proceedingsa@royalsociety.org](mailto:proceedingsa@royalsociety.org)  
Proceedings A

Reviewer(s)' Comments to Author:

Referee: 1

Comments to the Author(s)

This manuscript constitutes an important advancement towards fully utilizing the advantage offered to by the most complete---up to date---generalization of Bell inequalities, i.e. the "grasshopper inequalities". The paper considers two directions.

In one, the practically most relevant grasshopper problem on a sphere is restricted to its grand circle. The authors' solutions also illustrate how powerless our intuition is this class of problems--a failure similar to the one one experiences when the questions pertaining to the ergodicity and the temporal to ensemble average convergence in the irrational rotation problem. For one, there is a dramatic difference between cases when the first lawn and the second lawn are the same and the case when they are different. Also, the dangerously looking finite precision loophole unexpectedly closes when the circle is extended to the sphere.

In the spherical case, the authors refute two significant conjectures proposed in the foundational paper by Kent and Pitalua-Garcia. Also, for not too large jump angles, the intuition gained and the numerical methods developed by two of the authors in the planar case [Gulko-Kent (2017)] is proven useful and relevant in the spherical one.

The importance of this paper for improving the security of quantum encryption is hard to overestimate, and I suggest publishing as is.

Referee: 2

Comments to the Author(s)

This is a well-written paper. I have some comments:

1- The computational complexity of Globe-hopping should be discussed. I suggest using the big oh notation.

To have an unbiased view in the paper, there should be some discussions on the limitations the Globe-hopping

## Author's Response to Decision Letter for (RSPA-2020-0038.R0)

See Appendix A.

## Decision letter (RSPA-2020-0038.R1)

15-May-2020

Dear Dr Goulko

I am pleased to inform you that your manuscript entitled "Globe-hopping" has been accepted in its final form for publication in Proceedings A.

Our Production Office will be in contact with you in due course. You can expect to receive a proof of your article soon. Please contact the office to let us know if you are likely to be away from e-mail in the near future. If you do not notify us and comments are not received within 5 days of sending the proof, we may publish the paper as it stands.

#### Open access

You are invited to opt for open access, our author pays publishing model. Payment of open access fees will enable your article to be made freely available via the Royal Society website as soon as it is ready for publication. For more information about open access please visit [http://royalsocietypublishing.org/site/authors/open\\_access.xhtml](http://royalsocietypublishing.org/site/authors/open_access.xhtml). The open access fee for this journal is £1700/\$2380/€2040 per article. VAT will be charged where applicable.

Note that if you have opted for open access then payment will be required before the article is published – payment instructions will follow shortly.

If you wish to opt for open access then please inform the editorial office ([proceedingsa@royalsociety.org](mailto:proceedingsa@royalsociety.org)) as soon as possible.

Your article has been estimated as being 25 pages long. Our Production Office will inform you of the exact length at the proof stage.

Proceedings A levies charges for articles which exceed 20 printed pages. (based upon approximately 540 words or 2 figures per page). Articles exceeding this limit will incur page charges of £150 per page or part page, plus VAT (where applicable).

Under the terms of our licence to publish you may post the author generated postprint (ie. your accepted version not the final typeset version) of your manuscript at any time and this can be made freely available. Postprints can be deposited on a personal or institutional website, or a recognised server/repository. Please note however, that the reporting of postprints is subject to a media embargo, and that the status the manuscript should be made clear. Upon publication of the definitive version on the publisher's site, full details and a link should be added.

You can cite the article in advance of publication using its DOI. The DOI will take the form: 10.1098/rspa.XXXX.YYYY, where XXXX and YYYY are the last 8 digits of your manuscript number (eg. if your manuscript number is RSPA-2017-1234 the DOI would be 10.1098/rspa.2017.1234).

For tips on promoting your accepted paper see our blog post: <https://blogs.royalsociety.org/publishing/promoting-your-latest-paper-and-tracking-your-results/>

On behalf of the Editor of Proceedings A, we look forward to your continued contributions to the Journal.

Sincerely,  
Raminder Shergill  
[proceedingsa@royalsociety.org](mailto:proceedingsa@royalsociety.org)

on behalf of  
Dr Earl Campbell  
Board Member  
Proceedings A

## Appendix A

Dear Editor,

We thank the referees for reviewing our manuscript and for their positive assessment. Following the comments of Referee 2, we have extended the discussion of potential numerical investigations on the sphere.

To comply with the length requirements on the typeset paper we have combined the first two figures into one (as separate panels) and adjusted the size of the remaining figures. No changes to the content of the figures were made.

As requested, we have also split the Acknowledgements section into a separate section for Funding and the remainder of the Acknowledgements.

Yours sincerely,

Dmitry Chistikov, Olga Goulko, Adrian Kent, Mike Paterson
